# Supplementary material for: Distinctive Expansion of Potential Virulence Genes in the Genome of the Oomycete Fish Pathogen Saprolegnia parasitica
Source: PubMed Central journal article supplement (PMC3681718; doi:10.1371/journal.pgen.1003272), 2013-06-13

# Supplementary Figure S9

## A

### Substitution rate between N12 and CBS

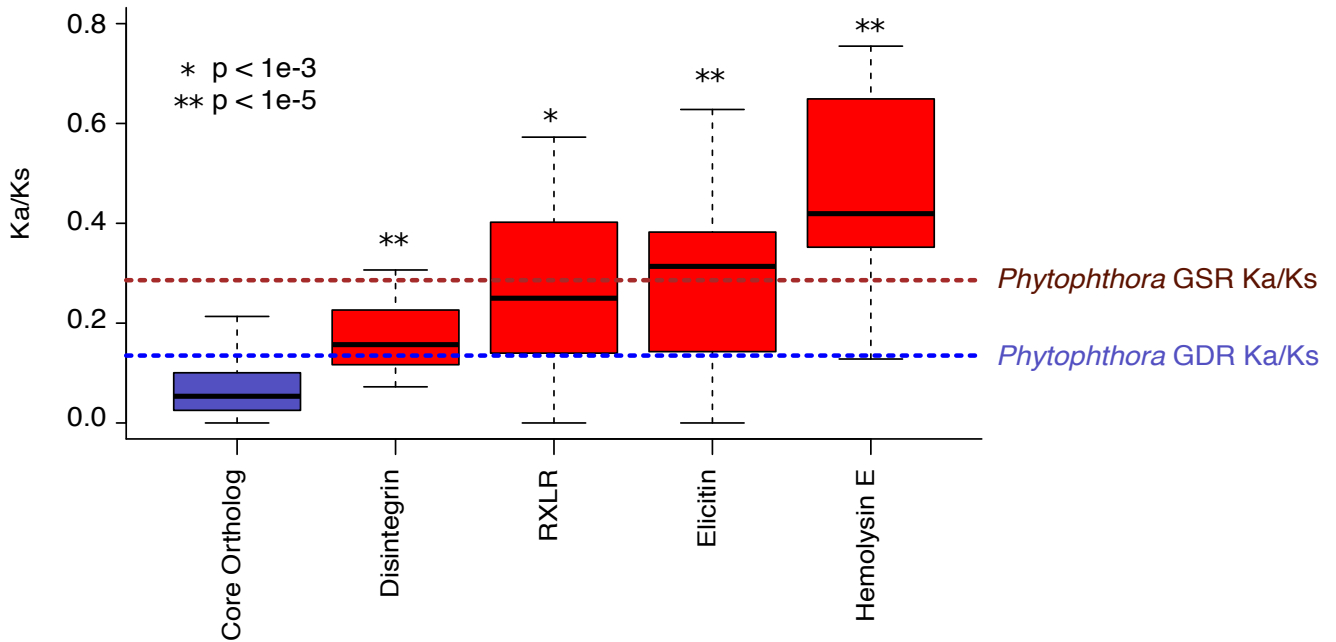

## B

### Substitution rate between haplotypes of CBS strain

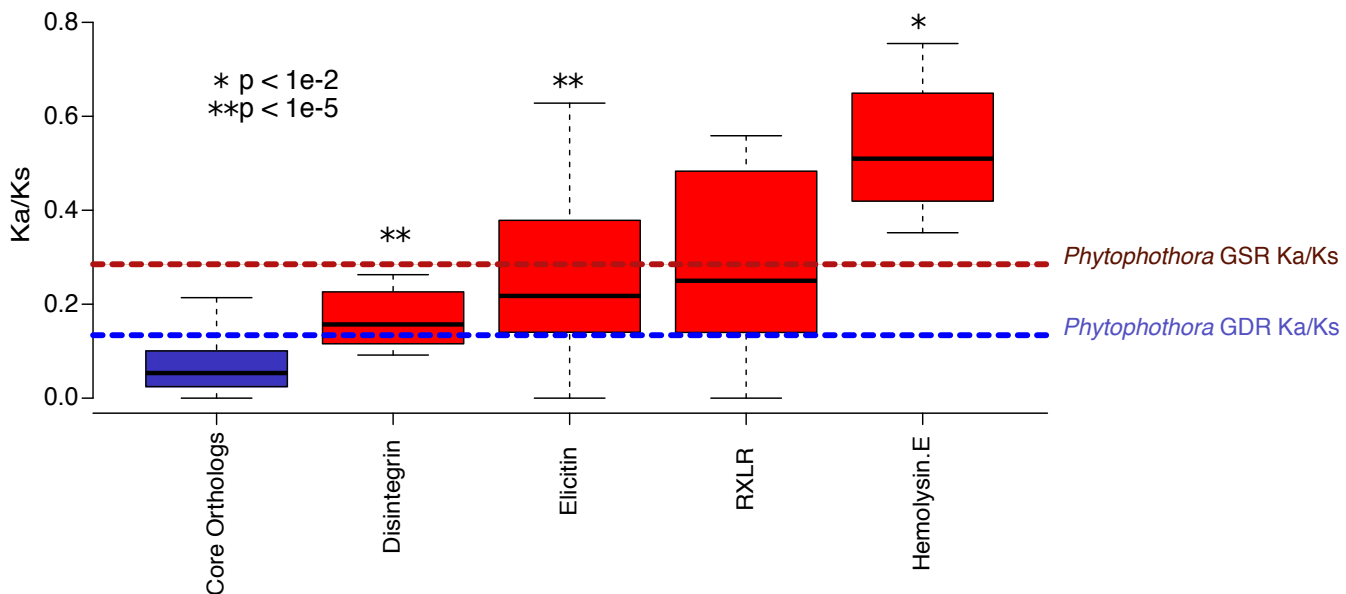

Supplement: pgen.1003272.s009.pdf [file pgen.1003272.s009.pdf]
