# Supplementary material for: Distinctive Expansion of Potential Virulence Genes in the Genome of the Oomycete Fish Pathogen Saprolegnia parasitica
Source: PubMed Central journal article supplement (PMC3681718; doi:10.1371/journal.pgen.1003272), 2013-06-13

# Supplementary Figure S11

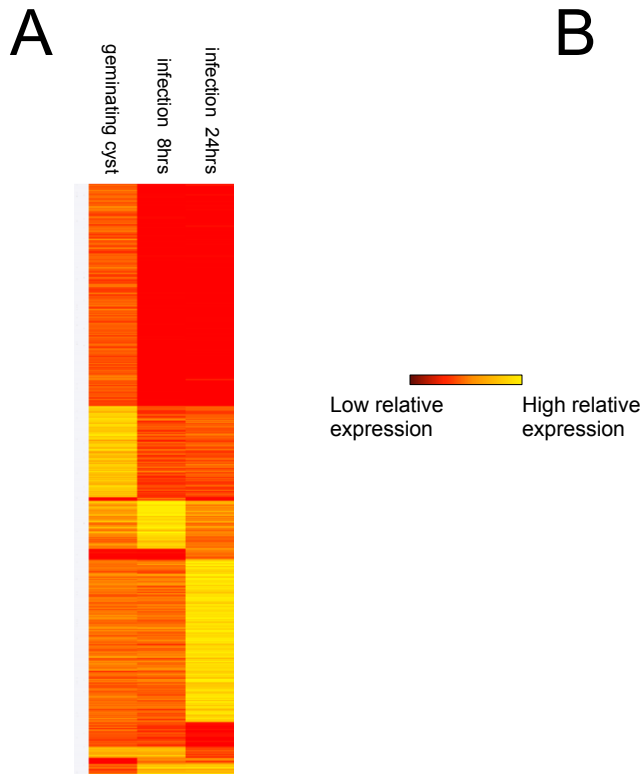

Differentially expressed genes during the infection time course

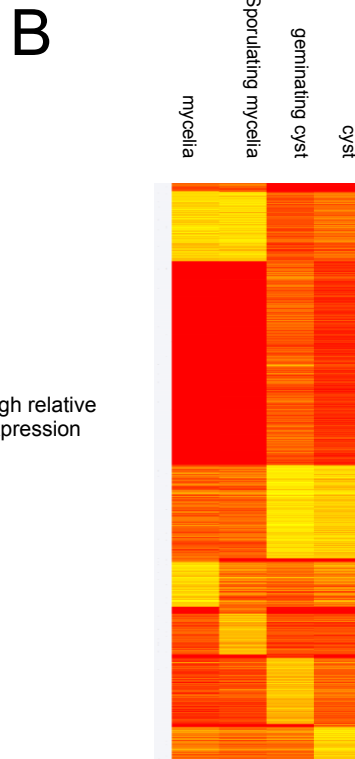

Differentially expressed genes in different life stages

**C**

|       | my   | s_my | cy   | g_cy | 8hrs | 24hrs |
|-------|------|------|------|------|------|-------|
| my    | 1    |      |      |      |      |       |
| s_my  | 0.88 | 1    |      |      |      |       |
| cy    | 0.77 | 0.74 | 1    |      |      |       |
| g_cy  | 0.84 | 0.79 | 0.93 | 1    |      |       |
| 8hrs  | 0.85 | 0.79 | 0.87 | 0.88 | 1    |       |
| 24hrs | 0.43 | 0.36 | 0.34 | 0.39 | 0.44 | 1     |

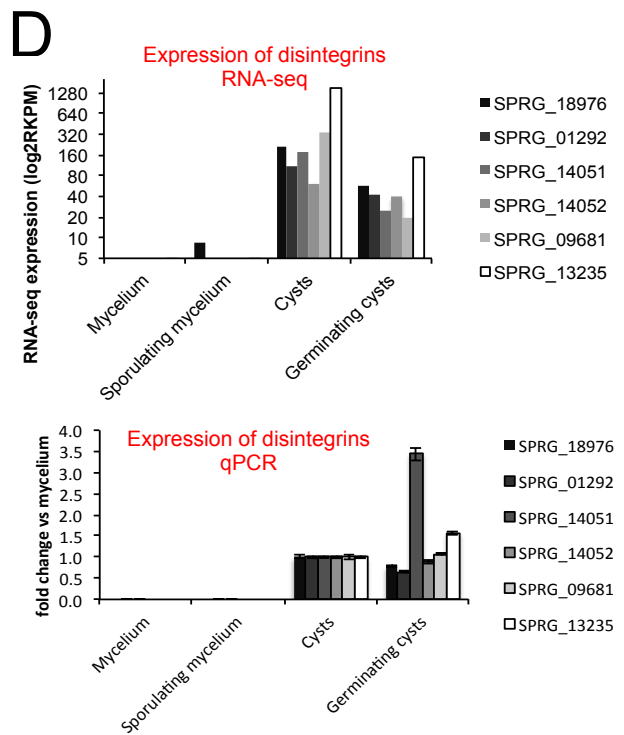

Supplement: pgen.1003272.s011.pdf [file pgen.1003272.s011.pdf]
