# Supplementary material for: Distinctive Expansion of Potential Virulence Genes in the Genome of the Oomycete Fish Pathogen Saprolegnia parasitica
Source: PLoS Genet. 2013 Jun 13;9(6):e1003272. doi: 10.1371/journal.pgen.1003272 (PMC3681718; doi:10.1371/journal.pgen.1003272)
Supplement: Table S11 — Polymorphism statistics for Saprolegenia strains. (XLSX) [file pgen.1003272.s023.xlsx]

## Sheet: Supp Table S11
Supplementary Table S11: Polymorphism Statistics for Saprolegenia Strains
Genome	SNP-type	Covered bases (Illumina reads)	Numer of SNPs	Mean	Mode
CBS	Het	48021326	505591	Not applicable due to LOH and haplotype assembly	2.6
N12	All	44734768	1467567	3.3	3.1
N12	Het	44734768	811149	1.8	1.7
